# Supplementary material
Source: bioRxiv or medRxiv preprint supplement (https://medrxiv.org/highwire/filestream/80649/field_highwire_adjunct_files/8/2020.05.08.20095943-8.pdf)
Supplement: Supplementary file [file 2020.05.08.20095943-8.pdf]

# Timeline

**31 Dec 2019 - China**

27 cases of pneumonia  
unknown etiology

**7 Jan 2020 - China**

2019 nCoV identified

**13 Jan 2020 – Thailand**

1st case outside China

**23 Jan 2020 – China**

Wuhan under  
quarantine

**30 Jan 2020 – WHO**

declare global  
public-health  
emergency

**27 Feb 2020 - Ecuador**

**1<sup>st</sup> COVID-19 case**

Reported in Ecuador

**15th Feb 2020 –**

First case in Ecuador  
according to the onset of  
the symptoms

**11 Mar 2020 Pandemic**

**National Sanitary  
Emergency declared**  
by Ecuadorian MoH

**13 Mar 2020**

Restriction of massive events  
National Emergency Committee  
for COVID-19

**17 Mar 2020**

Partial Lockdown

**24 Mar 2020**

Full lockdown  
announced

**25 Mar 2020**

Peak of COVID-19  
cases

**18 Apr 2020 - Ecuador**

**9468 cases confirmed**  
1061 discharges

w4

w1

w2

w3

w4

w1

w2

w3

w4

w1

w2

w3

w4

w1

w2

w3

w4

DEC 2019

JAN 2020

FEB 2020

MAR 2020

APR 2020
